# Supplementary material for: Untargeted Metabolic Profiling Cell-Based Approach of Pulmonary Artery Smooth Muscle Cells in Response to High Glucose and the Effect of the Antioxidant Vitamins D and E
Source: PubMed Central journal article supplement (PMC6316736; doi:10.3390/metabo8040087), 2018-11-30
Supplement: metabolites-08-00087-s001.pdf [file metabolites-08-00087-s001.pdf]

# Supplementary material: Untargeted Metabolic Profiling Cell-Based Approach of Pulmonary Artery Smooth Muscle Cells in Response to High Glucose and Roles of Antioxidant Vitamins D and E.

Abdulwahab Alamri <sup>1,2,\*</sup>, Abdulhadi S Burzangi <sup>2</sup>, Paul Coats <sup>2</sup>, David G Watson <sup>2</sup>

<sup>1</sup> Department of Pharmacology College of Pharmacy Sciences University of Hail, 55476 Hail, Saudi Arabia; ph.wahab@gmail.com (Alamri, A)

<sup>2</sup> Strathclyde institute of pharmacy and biomedical science, University of Strathclyde, 161 Cathedral street, Glasgow G4 0RE, UK; d.g.watson@strath.ac.uk (Watson, D.); paul.coats@strath.ac.uk (Coats, P.); abdulhadi.burzangi@strath.ac.uk (Burzangi, A.)

\* Correspondence: ph.wahab@gmail.com Tel: +44-141-548-2651; Fax +44-141-552-6443

Table S1: Significantly changed metabolites in PSMCs resulting from treatment with HG or HG + vitamin D or E.

| Mass                           | RT   | Met name                | -/+ | 25 mM/ 5 mM glucose |       | Vit. D/25 mM glucose |       | Vit. E/25 mM glucose |       |
|--------------------------------|------|-------------------------|-----|---------------------|-------|----------------------|-------|----------------------|-------|
|                                |      |                         |     | P.value             | Ratio | P.value              | Ratio | P.value              | Ratio |
| <b>Glutathione homeostasis</b> |      |                         |     |                     |       |                      |       |                      |       |
| 230.019                        | 16.7 | Xylulose 5-phosphate *  | -   | <0.001              | 2.041 | <0.001               | 0.520 | 0.153                | 0.726 |
| 232.035                        | 16.4 | Ribitol 5-phosphate     | -   | 0.017               | 1.666 | 0.007                | 0.393 | 0.032                | 0.444 |
| 307.084                        | 14.5 | Glutathione*            | -   | 0.003               | 0.801 | 0.010                | 1.277 | 0.023                | 1.495 |
| 335.079                        | 14.5 | S-Formyl glutathione    | +   | 0.007               | 1.290 | <0.001               | 0.234 | 0.020                | 0.217 |
| 744.076                        | 17.6 | NADP+                   | -   | 0.031               | 0.719 | 0.216                | 1.156 | 0.719                | 1.122 |
| 745.085                        | 18.4 | NADPH                   | -   | 0.532               | 0.819 | 0.044                | 0.323 | 0.134                | 0.604 |
| 612.152                        | 17.5 | Glutathione disulfide * | -   | 0.025               | 1.417 | 0.011                | 0.606 | 0.965                | 1.044 |
| <b>Purines and pyrimidines</b> |      |                         |     |                     |       |                      |       |                      |       |
| 111.043                        | 10.4 | Cytosine*               | -   | 0.206               | 1.084 | 0.004                | 0.635 | 0.006                | 0.679 |
| 136.038                        | 10.2 | Hypoxanthine *          | +   | 0.009               | 1.221 | <0.001               | 8.943 | 0.002                | 8.221 |
| 151.049                        | 11.8 | Guanine *               | +   | 0.046               | 1.675 | 0.061                | 0.095 | 0.005                | 0.367 |
| 152.033                        | 12.0 | Xanthine *              | -   | 0.473               | 1.374 | 0.603                | 1.209 | 0.625                | 1.225 |
| 158.044                        | 14.7 | Allantoin               | -   | 0.033               | 0.535 | 0.099                | 0.460 | 0.132                | 0.542 |

|                           |      |                             |   |       |       |        |       |        |       |
|---------------------------|------|-----------------------------|---|-------|-------|--------|-------|--------|-------|
| 168.028                   | 13.6 | Urate                       | - | 0.979 | 0.992 | 0.127  | 0.396 | 0.168  | 0.502 |
| 244.070                   | 9.9  | Uridine *                   | - | 0.002 | 1.584 | <0.001 | 0.297 | 0.004  | 0.269 |
| 244.070                   | 12.2 | Pseudouridine               | - | 0.017 | 1.381 | <0.001 | 0.337 | 0.279  | 0.408 |
| 268.081                   | 11.0 | Inosine*                    | + | 0.154 | 0.381 | 0.083  | 4.940 | 0.173  | 8.201 |
| 324.036                   | 17.4 | UMP *                       | - | 0.033 | 1.580 | 0.002  | 0.498 | 0.004  | 0.593 |
| 332.053                   | 15.4 | Deoxyinosine monophosphate  | + | 0.032 | 0.598 | 0.138  | 1.422 | 0.300  | 1.244 |
| 347.063                   | 14.3 | AMP *                       | - | 0.808 | 1.019 | 0.001  | 0.560 | 0.074  | 0.681 |
| 348.047                   | 16.2 | IMP                         | - | 0.794 | 0.861 | 0.861  | 0.906 | 0.722  | 1.201 |
| 403.018                   | 18.3 | CDP                         | - | 0.836 | 1.013 | 0.001  | 0.592 | 0.319  | 0.777 |
| 427.029                   | 16.2 | ADP *                       | + | 0.699 | 1.039 | 0.009  | 0.718 | 0.457  | 0.828 |
| 482.985                   | 21.1 | CTP                         | - | 0.161 | 0.894 | 0.002  | 0.447 | 0.089  | 0.580 |
| 483.969                   | 20.2 | UTP                         | - | 0.310 | 0.870 | <0.001 | 0.339 | 0.005  | 0.380 |
| 506.996                   | 17.1 | ATP *                       | + | 0.010 | 0.858 | <0.001 | 0.476 | 0.094  | 0.593 |
| 488.108                   | 15.8 | CDP-choline                 | - | 0.014 | 0.694 | 0.623  | 1.035 | 0.151  | 1.381 |
| 537.076                   | 17.6 | CDP-ribitol                 | - | 0.009 | 1.944 | 0.291  | 0.429 | 0.072  | 0.687 |
| <b>Glucose metabolism</b> |      |                             |   |       |       |        |       |        |       |
| 90.032                    | 10.4 | (R)-Lactate                 | - | 0.304 | 1.384 | 0.004  | 0.459 | 0.087  | 0.581 |
| 87.010                    | 8.8  | Pyruvate *                  | - | 0.098 | 1.076 | 0.431  | 0.971 | 0.351  | 1.147 |
| 116.011                   | 15.8 | Fumarate *                  | - | 0.023 | 1.286 | <0.001 | 0.303 | 0.009  | 0.429 |
| 118.027                   | 16.4 | Succinate *                 | - | 0.339 | 1.191 | 0.278  | 0.708 | 0.496  | 0.754 |
| 134.022                   | 17.4 | (S)-Malate *                | - | 0.034 | 1.171 | 0.015  | 0.660 | 0.019  | 0.763 |
| 169.989                   | 16.3 | Glyceraldehyde 3-phosphate* | - | 0.022 | 5.157 | 0.397  | 0.911 | 0.657  | 0.889 |
| 169.989                   | 17.3 | Dihydroxyacetone phosphate* | - | 0.001 | 4.408 | 0.018  | 0.816 | 0.199  | 0.686 |
| 192.019                   | 19.6 | Citrate *                   | - | 0.018 | 0.763 | 0.272  | 0.077 | 0.534  | 0.006 |
| 196.058                   | 14.4 | Gluconic acid               | - | 0.005 | 1.364 | <0.001 | 0.199 | <0.001 | 0.267 |
| 260.030                   | 17.8 | Glucose 6-phosphate*        | - | 0.004 | 1.230 | 0.158  | 0.738 | 0.279  | 0.783 |
| 260.030                   | 16.8 | Glucose 1-phosphate *       | - | 0.041 | 2.055 | 0.017  | 0.686 | 0.204  | 0.792 |
| 260.030                   | 17.2 | Fructose 6-phosphate*       | - | 0.009 | 2.37  | 0.012  | 0.81  | 0.077  | 1.08  |
| 289.033                   | 17.2 | Sedoheptulose 7-phosphate   | - | 0.040 | 2.119 | 0.896  | 0.992 | 0.671  | 1.098 |

|                               |      |                          |   |        |         |        |       |       |       |
|-------------------------------|------|--------------------------|---|--------|---------|--------|-------|-------|-------|
| 318.030                       | 16.4 | Octulose 8-phosphate     | - | <0.001 | 1.229   | 0.008  | 0.261 | 0.052 | 0.436 |
| 566.055                       | 17.4 | UDP-glucose              | - | 0.012  | 1.312   | <0.001 | 0.507 | 0.056 | 0.693 |
| 580.035                       | 20.7 | UDP-glucuronate          | - | 0.082  | 1.170   | <0.001 | 0.443 | 0.028 | 0.502 |
| 663.109                       | 14.4 | NAD+ *                   | - | 0.151  | 1.005   | <0.001 | 0.571 | 0.636 | 0.044 |
| 665.125                       | 14.1 | NADH *                   | - | 0.016  | 1.177   | 0.021  | 0.818 | 0.385 | 0.851 |
| 666.222                       | 18.0 | Maltotetraose            | - | <0.001 | 4.581   | 0.035  | 0.824 | 0.622 | 0.938 |
| 809.120                       | 13.0 | Acetyl-CoA *             | - | 0.165  | 1.127   | 0.284  | 0.702 | 0.604 | 0.840 |
| 828.275                       | 18.5 | Maltopentaose            | - | 0.053  | 6.750   | 0.775  | 0.979 | 0.662 | 1.148 |
| 320.051                       | 17.5 | Octulose phosphate       | - | <0.001 | 4.441   | 0.008  | 1.607 | 0.152 | 1.719 |
| 350.062                       | 17.7 | Nonulose phosphate       | - | <0.001 | 893.963 | 0.053  | 1.279 | 0.097 | 1.620 |
| <b>Fatty acids and Lipids</b> |      |                          |   |        |         |        |       |       |       |
| 101.024                       | 13.3 | Acetoacetate *           | + | 0.007  | 1.266   | 0.228  | 0.924 | 0.410 | 0.868 |
| 214.193                       | 3.8  | Tridecanoic acid         | - | 0.040  | 0.805   | 0.013  | 1.994 | 0.021 | 1.764 |
| 216.136                       | 7.4  | Undecane dioic acid      | - | 0.003  | 0.778   | 0.074  | 0.901 | 0.077 | 0.894 |
| 228.209                       | 3.7  | Tetra decanoic acid      | - | 0.017  | 0.587   | 0.016  | 1.751 | 0.029 | 1.809 |
| 238.157                       | 3.8  | Oxotetradecadienoic acid | - | 0.040  | 1.291   | 0.482  | 0.935 | 0.761 | 0.973 |
| 242.225                       | 3.7  | Pentadecanoic acid       | - | 0.049  | 0.673   | 0.018  | 1.880 | 0.046 | 1.739 |
| 256.240                       | 3.7  | Hexadecanoic acid        | - | 0.009  | 0.773   | 0.143  | 1.563 | 0.016 | 2.111 |
| 270.256                       | 3.7  | Heptadecanoic acid       | - | 0.023  | 0.581   | 0.005  | 1.712 | 0.039 | 1.941 |
| 280.240                       | 3.7  | Linoleic acid            | - | 0.474  | 1.132   | 0.024  | 1.749 | 0.064 | 1.843 |
| 284.272                       | 3.7  | Octadecanoic acid        | - | 0.021  | 0.682   | 0.213  | 1.547 | 0.040 | 2.016 |
| 298.287                       | 3.6  | Nonadecanoic acid        | - | 0.005  | 0.714   | 0.005  | 1.727 | 0.026 | 2.154 |
| 308.272                       | 3.7  | Eicosadienoic acid       | - | 0.911  | 1.011   | 0.014  | 1.630 | 0.042 | 1.803 |
| 312.303                       | 3.6  | Eicosanoic acid          | - | 0.002  | 0.666   | 0.029  | 1.682 | 0.035 | 1.918 |
| 332.272                       | 3.6  | Docosatetraenoic acid    | - | 0.009  | 1.330   | <0.001 | 4.742 | 0.001 | 5.234 |
| 334.287                       | 3.7  | Docosatrienoic acid      | - | 0.356  | 1.174   | 0.001  | 2.165 | 0.023 | 2.771 |
| 340.334                       | 3.6  | Docosanoic acid          | - | 0.005  | 0.686   | 0.038  | 1.632 | 0.145 | 1.220 |
| 366.350                       | 3.6  | Nervonic acid            | - | 0.032  | 0.774   | 0.011  | 0.779 | 0.169 | 0.739 |
| 767.115                       | 7.5  | CoA                      | - | 0.007  | 0.762   | 0.154  | 0.744 | 0.263 | 0.725 |

|                   |     |                       |   |       |       |        |       |        |       |
|-------------------|-----|-----------------------|---|-------|-------|--------|-------|--------|-------|
| 410.243           | 4.3 | LPA16:0               | - | 0.047 | 0.871 | 0.005  | 0.788 | 0.197  | 0.797 |
| 436.259           | 4.2 | LPA18:1               | - | 0.015 | 0.828 | <0.001 | 0.584 | 0.022  | 0.590 |
| 453.285           | 4.2 | LPE16:0               | + | 0.035 | 0.747 | 0.010  | 0.481 | 0.029  | 0.585 |
| 479.301           | 4.2 | LPE18:1               | - | 0.004 | 0.739 | <0.001 | 0.329 | <0.001 | 0.370 |
| 497.275           | 4.0 | LPS16:0               | - | 0.003 | 0.713 | 0.096  | 0.868 | 0.330  | 0.833 |
| 523.291           | 3.9 | LPS18:1               | - | 0.009 | 0.861 | <0.001 | 0.335 | 0.009  | 0.389 |
| 525.307           | 3.9 | LPS18:0               | - | 0.005 | 0.826 | <0.001 | 0.467 | 0.016  | 0.541 |
| 545.275           | 3.9 | LPS20:4               | - | 0.015 | 1.335 | 0.723  | 1.037 | 0.563  | 1.127 |
| 556.280           | 3.7 | LPG22:6               | - | 0.022 | 1.206 | <0.001 | 0.402 | 0.021  | 0.516 |
| 569.276           | 3.9 | LPS22:6               | - | 0.042 | 0.753 | 0.193  | 0.186 | 0.004  | 0.256 |
| 572.296           | 4.0 | LPI16:0               | - | 0.012 | 0.852 | <0.001 | 0.262 | 0.001  | 0.271 |
| 596.296           | 4.0 | LPI18:2               | - | 0.037 | 0.754 | 0.001  | 0.412 | 0.021  | 0.369 |
| 600.328           | 4.0 | LPI18:0               | - | 0.047 | 0.950 | <0.001 | 0.209 | 0.002  | 0.223 |
| 620.296           | 4.0 | LPI20:4               | - | 0.011 | 0.874 | <0.001 | 0.482 | 0.032  | 0.514 |
| 698.489           | 3.8 | PA36:3                | - | 0.001 | 0.732 | 0.001  | 0.579 | <0.001 | 0.430 |
| 700.505           | 3.7 | PA36:2                | - | 0.007 | 0.769 | 0.046  | 0.852 | 0.001  | 0.588 |
| 720.494           | 3.5 | PG32:1                | - | 0.026 | 1.539 | 0.044  | 0.843 | 0.293  | 0.809 |
| 731.546           | 3.8 | PC32:1                | - | 0.897 | 0.917 | 0.001  | 0.429 | 0.001  | 0.355 |
| 755.546           | 3.7 | PC34:3                | - | 0.028 | 0.670 | 0.078  | 0.143 | 0.082  | 0.160 |
| 779.546           | 3.8 | PC36:5                | - | 0.659 | 1.064 | 0.001  | 0.394 | 0.001  | 0.404 |
| 783.505           | 3.5 | PS36:4                | - | 0.041 | 1.308 | 0.007  | 1.586 | 0.133  | 1.176 |
| 805.561           | 3.7 | PC38:6                | - | 0.810 | 1.019 | <0.001 | 0.448 | <0.001 | 0.404 |
| 820.526           | 3.4 | PG40:7                | - | 0.001 | 0.688 | <0.001 | 0.175 | <0.001 | 0.176 |
| 846.542           | 3.4 | PG42:8                | - | 0.021 | 0.805 | 0.020  | 0.810 | 0.105  | 0.700 |
| 856.510           | 3.5 | PI36:5                | - | 0.028 | 0.627 | 0.289  | 0.382 | 0.004  | 0.382 |
| <b>Carnitines</b> |     |                       |   |       |       |        |       |        |       |
| 231.147           | 8.4 | Butyrylcarnitine      | - | 0.956 | 0.994 | <0.001 | 0.002 | <0.001 | 0.002 |
| 245.162           | 5.2 | Valerylcarnitine      | - | 0.217 | 1.012 | <0.001 | 0.001 | <0.001 | 0.001 |
| 397.319           | 4.3 | Hexadecenoylcarnitine | + | 0.036 | 1.336 | 0.017  | 0.687 | 0.143  | 0.828 |

|                    |      |                                |   |        |       |        |       |        |       |
|--------------------|------|--------------------------------|---|--------|-------|--------|-------|--------|-------|
| 413.314            | 4.5  | Hydroxyhexadecenoylcarnitine   | + | 0.374  | 0.003 | <0.001 | 1654  | <0.001 | 1637  |
| 425.350            | 4.3  | Oleoylcarnitine                | + | 0.018  | 1.283 | 0.006  | 0.500 | 0.023  | 0.547 |
| <b>Amino acids</b> |      |                                |   |        |       |        |       |        |       |
| 103.063            | 15.7 | Aminobutanoate                 | + | 0.030  | 1.194 | 0.001  | 1.410 | 0.038  | 1.635 |
| 117.079            | 12.2 | Aminopentanoate                | + | 0.015  | 1.213 | <0.001 | 0.271 | 0.004  | 0.339 |
| 146.106            | 25.2 | Lysine*                        | + | 0.044  | 1.133 | 0.091  | 0.866 | <0.001 | 0.412 |
| 218.127            | 14.4 | N2-(D-1-Carboxyethyl)-L-lysine | + | 0.002  | 1.535 | <0.001 | 0.240 | 0.005  | 0.336 |
| 119.058            | 15.0 | Threonine*                     | - | 0.626  | 1.085 | 0.009  | 0.556 | 0.049  | 0.591 |
| 125.014            | 15.9 | Taurine*                       | - | 0.058  | 1.107 | <0.001 | 0.227 | 0.002  | 0.276 |
| 132.053            | 15.9 | Asparagine                     | + | 0.074  | 0.798 | <0.001 | 0.216 | 0.001  | 0.240 |
| 132.090            | 23.8 | Ornithine                      | + | 0.549  | 0.988 | 0.021  | 0.365 | 0.026  | 0.379 |
| 133.037            | 15.8 | Aspartate *                    | - | 0.007  | 0.707 | <0.001 | 0.289 | 0.004  | 0.374 |
| 147.050            | 15.4 | Glutamate*                     | - | 0.024  | 1.453 | 0.078  | 0.83  | 0.154  | 1.10  |
| 89.047             | 15.2 | Alanine*                       | - | 0.482  | 1.108 | <0.001 | 0.258 | 0.001  | 0.279 |
| 204.090            | 11.8 | Tryptophan*                    | - | 0.008  | 1.152 | 0.059  | 0.852 | 0.112  | 0.471 |
| 174.112            | 26.6 | Arginine*                      | - | 0.035  | 1.141 | 0.020  | 0.861 | 0.002  | 0.723 |
| 115.063            | 12.9 | Proline*                       | + | 0.001  | 1.212 | 0.036  | 0.936 | 0.131  | 1.052 |
| 161.069            | 15.6 | N-Methyl-L-glutamate           | + | 0.021  | 1.182 | <0.001 | 0.390 | 0.004  | 0.386 |
| 131.069            | 14.9 | Creatine*                      | - | 0.925  | 0.965 | 0.001  | 0.374 | 0.005  | 0.488 |
| 175.100            | 16.1 | Citrulline*                    | - | <0.001 | 0.832 | 0.011  | 0.87  | 0.002  | 0.55  |
| 155.070            | 15.8 | Histidine*                     | - | 0.004  | 0.774 | 0.632  | 0.94  | 0.087  | 0.71  |

(\*) means that metabolite matches standard retention time

Diagram below illustrates the steps of data filtration:

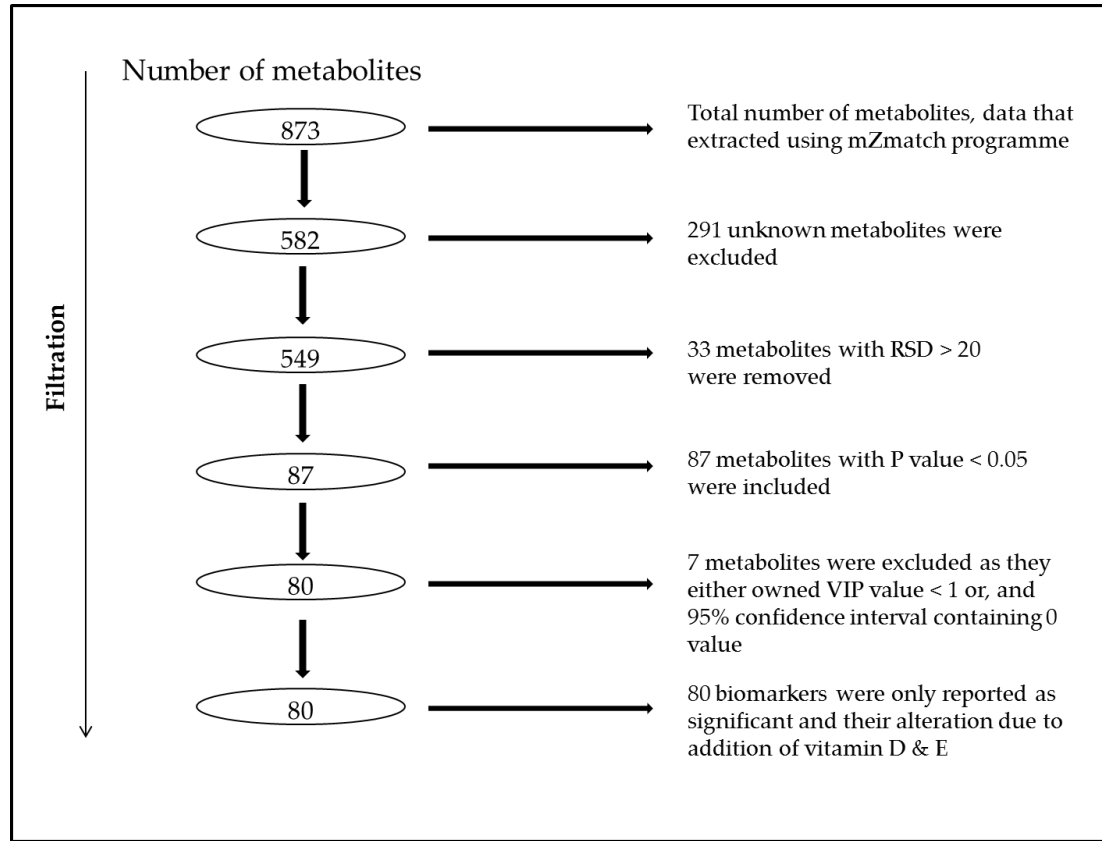

Figure S1: Data filtration steps.

Extracted data were normalized using log<sub>2</sub> transformation, how data distribution has changed can be seen in the figure below.

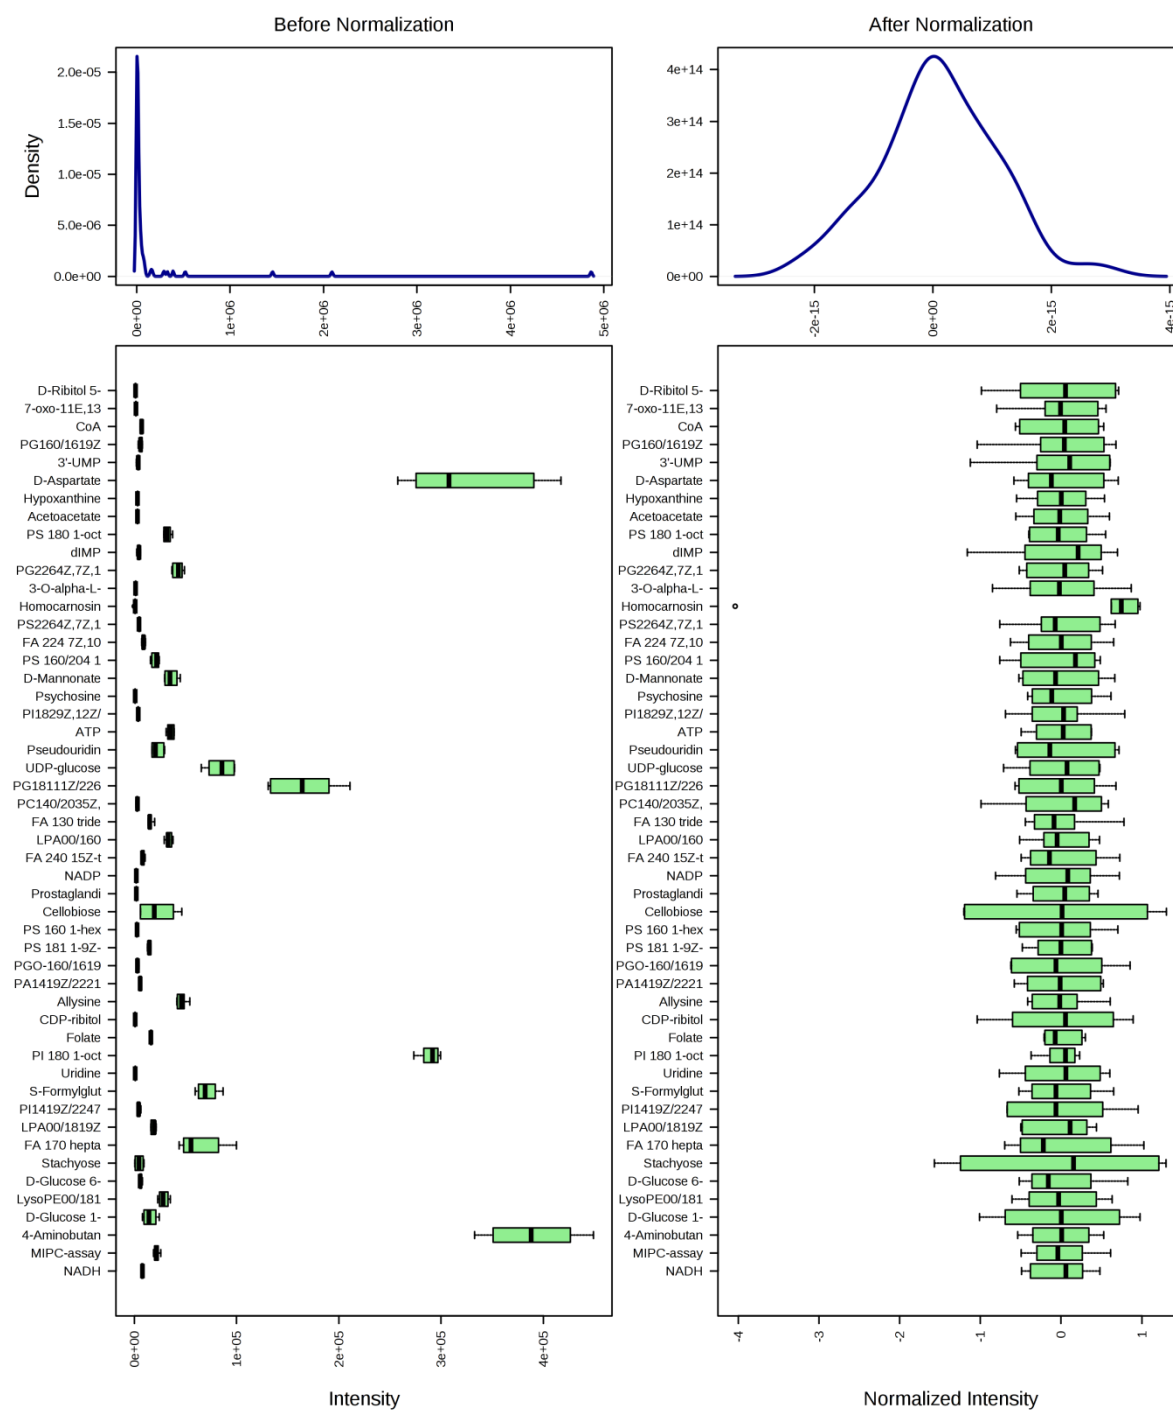

Figure S2: How data log<sub>2</sub> transformation of metabolites' intensity improves data distribution.

RT: 10.00 - 25.00 SM: 9G

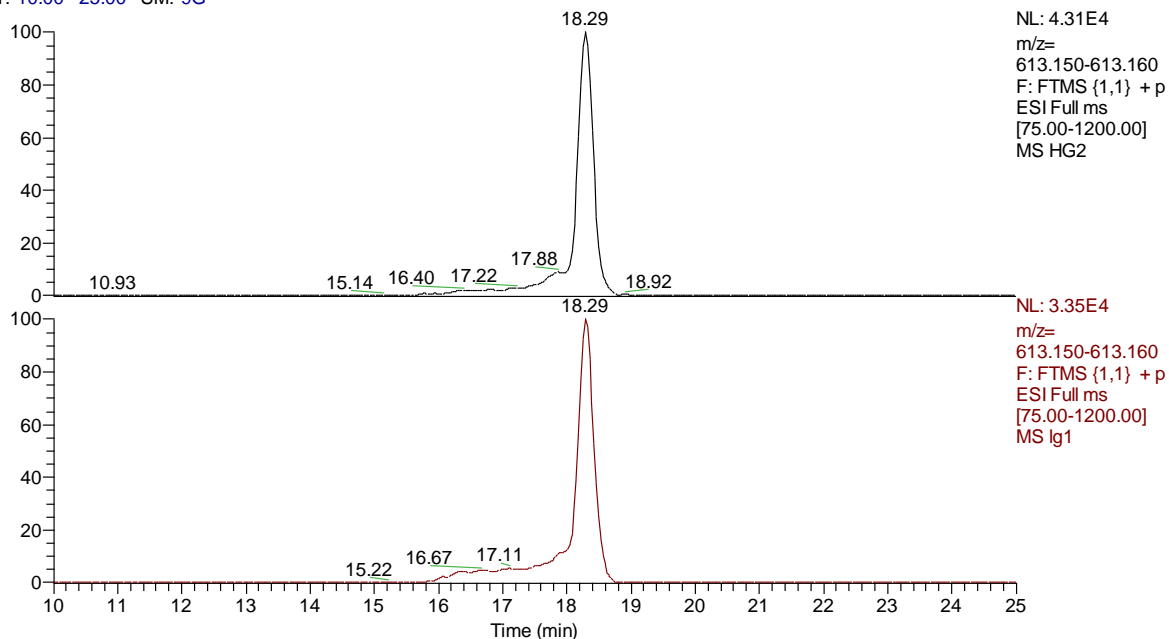

Figure S3: Comparison of extracted ion traces for GSSG, HG media, and LG media.

RT: 14.00 - 22.00 SM: 7G

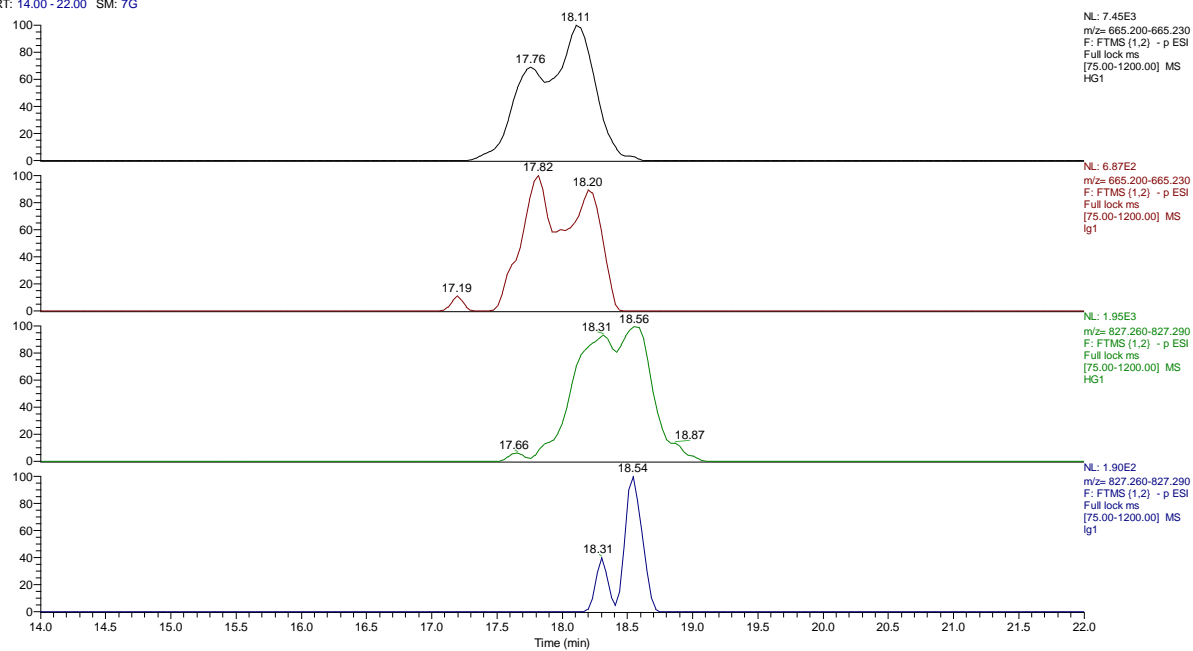

Figure S4: Extracted ion traces for maltotetraose and maltopentaose in HG and LG media.
